# Supplementary material for: Protective Effects of Swertiamarin against Methylglyoxal-Induced Epithelial-Mesenchymal Transition by Improving Oxidative Stress in Rat Kidney Epithelial (NRK-52E) Cells
Source: MDPI journal article supplement (doi:10.3390/molecules26092748), 2021-05-07
Supplement: s1 [file s1]

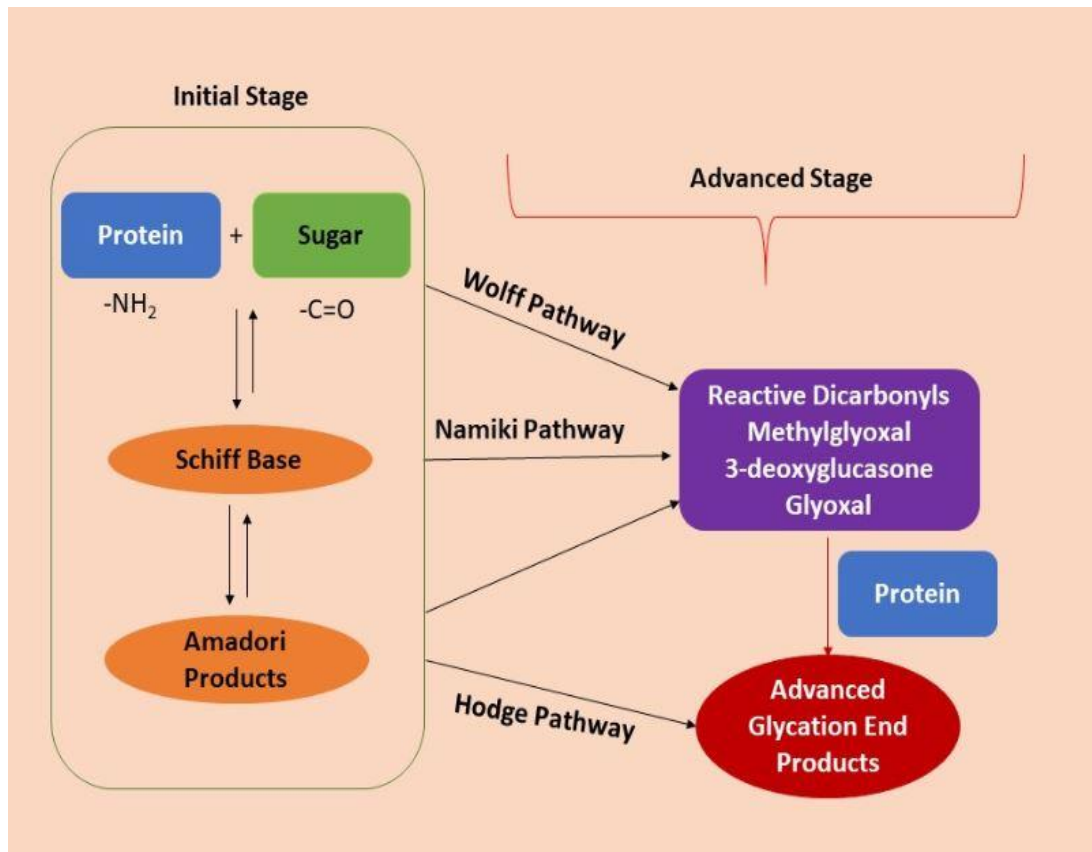

**Supplementary figure 1:** The stages involved in the formation of advanced glycation end products.
